# Supplementary material for: Phytochemical Profile and Antioxidant Activity of Lavandula angustifolia and Lavandula x intermedia Cultivars Extracted with Different Methods
Source: MDPI journal article supplement (doi:10.3390/antiox11040711), 2022-04-05
Supplement: s1 [file s1]

## Supplementary Materials

Table S1: Calibration curves, concentration range, limit of detection (LOD), and limit of quantification (LOQ) for standards.

| Compound        | Retention time (min.) | Calibration curve              | R <sup>2</sup> | Linear range (mg/mL) | LOD (mg/mL) | LOQ (mg/mL) |
|-----------------|-----------------------|--------------------------------|----------------|----------------------|-------------|-------------|
| Caffeic acid    | 17.5                  | $y = 49397035.98x + 4835.25$   | 0.9987         | 0.01 - 0.10          | 0.008       | 0.024       |
| Ferulic acid    | 31.1                  | $y = 50589523.70x + 25423.55$  | 0.9998         | 0.01 - 0.40          | 0.009       | 0.028       |
| Coumarin        | 44.1                  | $y = 12131245.04x + 83143.09$  | 0.9986         | 0.01 - 0.20          | 0.016       | 0.047       |
| Rosmarinic acid | 45.9                  | $y = 29357372.96x - 81691.18$  | 0.9989         | 0.01 - 0.30          | 0.018       | 0.055       |
| Morin           | 51.2                  | $y = 15364684.92x - 65644.56$  | 0.9988         | 0.01 - 0.30          | 0.020       | 0.059       |
| Herniarin       | 55.0                  | $y = 44968245.58x + 148823.98$ | 0.9977         | 0.01 - 0.25          | 0.021       | 0.065       |

y – peak area (AU), x – concentration of the compound (mg/mL)

Table S2: Intra- and interday precision for determination of phenolic compounds by HPLC-DAD.

| Compound        | Concentration (mg/mL) | Intraday RSD (%) | Interday RSD (%) |
|-----------------|-----------------------|------------------|------------------|
| Rosmarinic acid | 0.040                 | 0.288            | 0.326            |
|                 | 0.080                 | 0.221            | 0.340            |
|                 | 0.200                 | 0.182            | 0.317            |
| Herniarin       | 0.040                 | 0.064            | 0.198            |
|                 | 0.080                 | 0.143            | 0.195            |
|                 | 0.200                 | 0.045            | 0.057            |

Table S3: Compounds identified in aqueous-ethanolic and aqueous extracts of lavender and lavandin.

| Peak number | Compound               | Retention time (min.) | Molecular formula                               | Molecular weight (g/mol) | $\lambda_{\max}$ (nm) ( $A_{\max}$ )           | Ion fragments      |
|-------------|------------------------|-----------------------|-------------------------------------------------|--------------------------|------------------------------------------------|--------------------|
| 1           | Chlorogenic acid       | 13.2                  | C <sub>16</sub> H <sub>18</sub> O <sub>9</sub>  | 354.31                   | 218 (1.15), 245 (0.81), 302 (1.10), 330 (1.44) | 191, 179, 161      |
| 2           | Caffeic acid           | 17.5                  | C <sub>9</sub> H <sub>8</sub> O <sub>4</sub>    | 180.16                   | 218 (2.11), 243 (1.59), 298 (2.13), 324 (2.61) | 179, 134           |
| 3           | Vanillin               | 24.2                  | C <sub>8</sub> H <sub>8</sub> O <sub>3</sub>    | 152.15                   | 206 (2.52), 230 (2.88), 278 (2.06), 308 (1.98) | 151, 136, 123, 109 |
| 4           | Ferulic acid glucoside | 29.5                  | C <sub>16</sub> H <sub>20</sub> O <sub>9</sub>  | 355.10                   | 293 (-), 318 (-)                               | 193, 149, 134      |
| 5           | Ferulic acid           | 31.1                  | C <sub>10</sub> H <sub>10</sub> O <sub>4</sub>  | 194.18                   | 218 (1.76), 235 (1.59), 295 (1.83), 322 (2.40) | 193, 178, 149, 134 |
| 6           | Ellagic acid           | 31.9                  | C <sub>14</sub> H <sub>6</sub> O <sub>8</sub>   | 302.19                   | 202 (1.06), 252 (3.72), 366 (0.84)             | 301, 257, 229, 185 |
| 7           | Isoquercitrin          | 35.3                  | C <sub>21</sub> H <sub>20</sub> O <sub>12</sub> | 464.40                   | 207 (2.40), 257 (1.40), 358 (1.15)             | 300, 271, 255, 178 |
| 8           | Coumarin               | 44.1                  | C <sub>9</sub> H <sub>6</sub> O <sub>2</sub>    | 146.14                   | 212 (2.93), 274 (2.26), 310 (1.16)             | 147, 119, 91       |
| 9           | Rosmarinic acid        | 45.9                  | C <sub>18</sub> H <sub>16</sub> O <sub>8</sub>  | 360.30                   | 203 (1.26), 291 (0.46), 330 (0.62)             | 197, 179, 161, 135 |
| 10          | Morin                  | 51.2                  | C <sub>15</sub> H <sub>10</sub> O <sub>7</sub>  | 302.23                   | 207 (2.31), 255 (1.17), 358 (0.91)             | 271, 163           |
| 11          | Herniarin              | 55.0                  | C <sub>10</sub> H <sub>8</sub> O <sub>3</sub>   | 176.17                   | 205 (2.48), 216 (2.22), 325 (2.58)             | 176, 148, 133      |

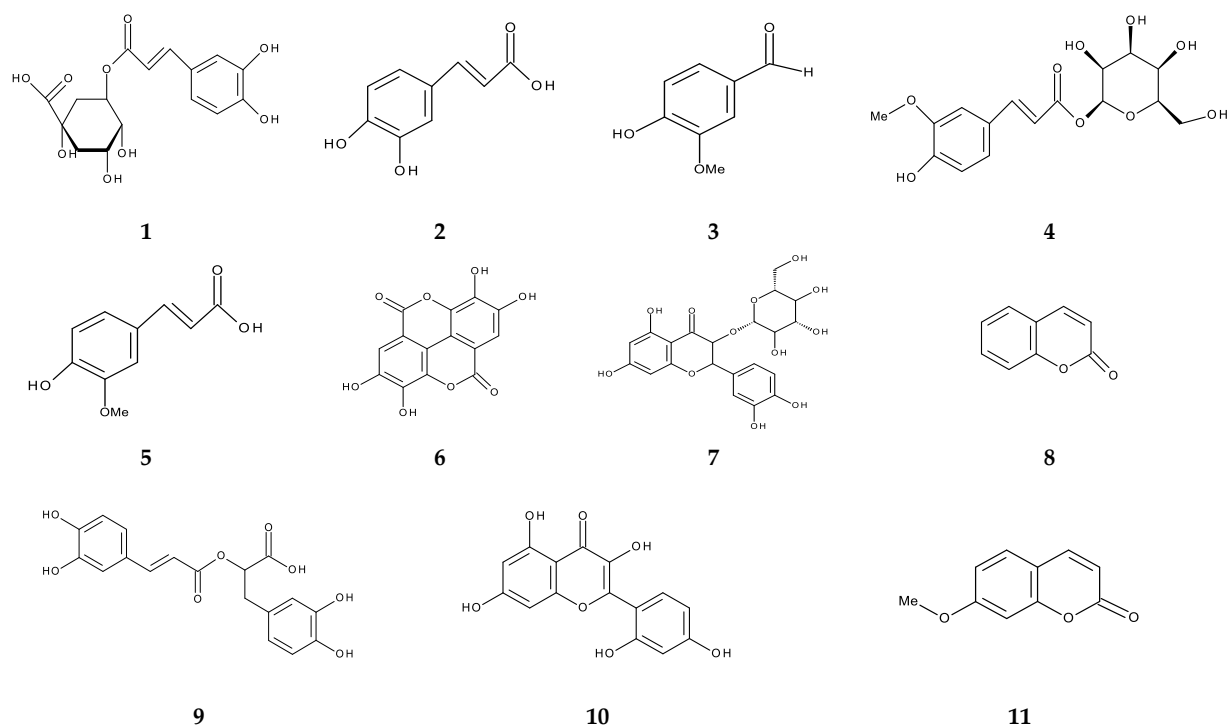

Figure S1: Chemical structures of the compounds of *Lavandula angustifolia* and *Lavandula x intermedia*: 1 - chlorogenic acid, 2 - caffeic acid, 3 – vanillin, 4 - ferulic acid glucoside, 5 - ferulic acid, 6 - ellagic acid, 7 – isoquercitrin, 8 – coumarin, 9 - rosmarinic acid, 10 – morin, 11 – herniarin

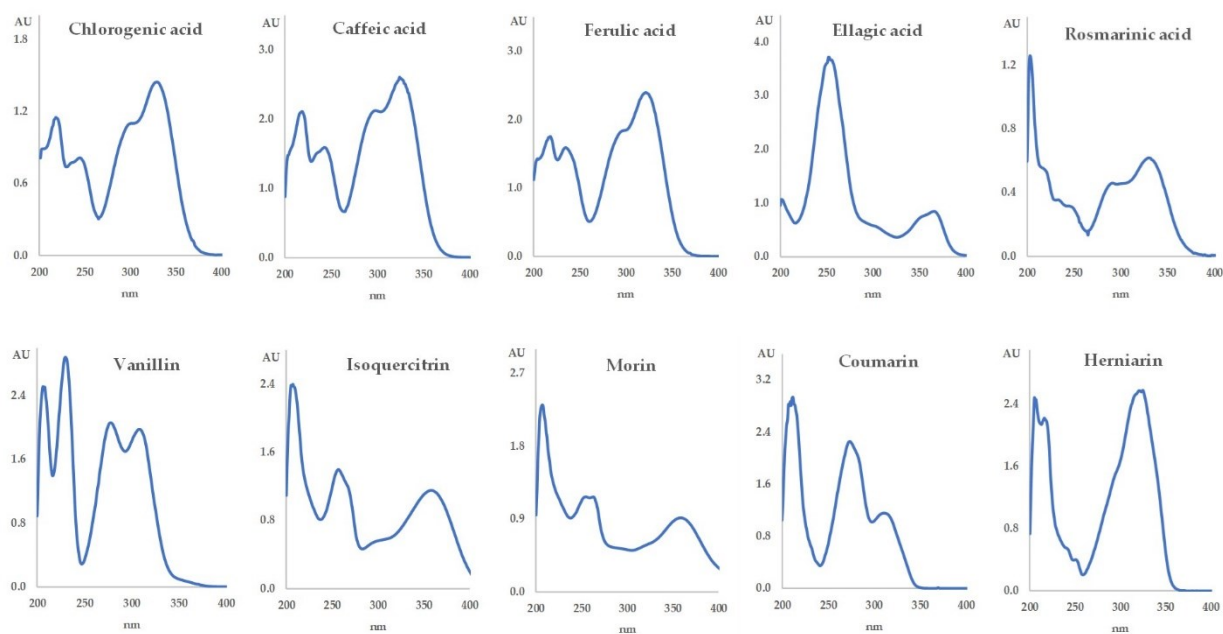

Figure S2: UV spectra of phenolic compounds and coumarins.

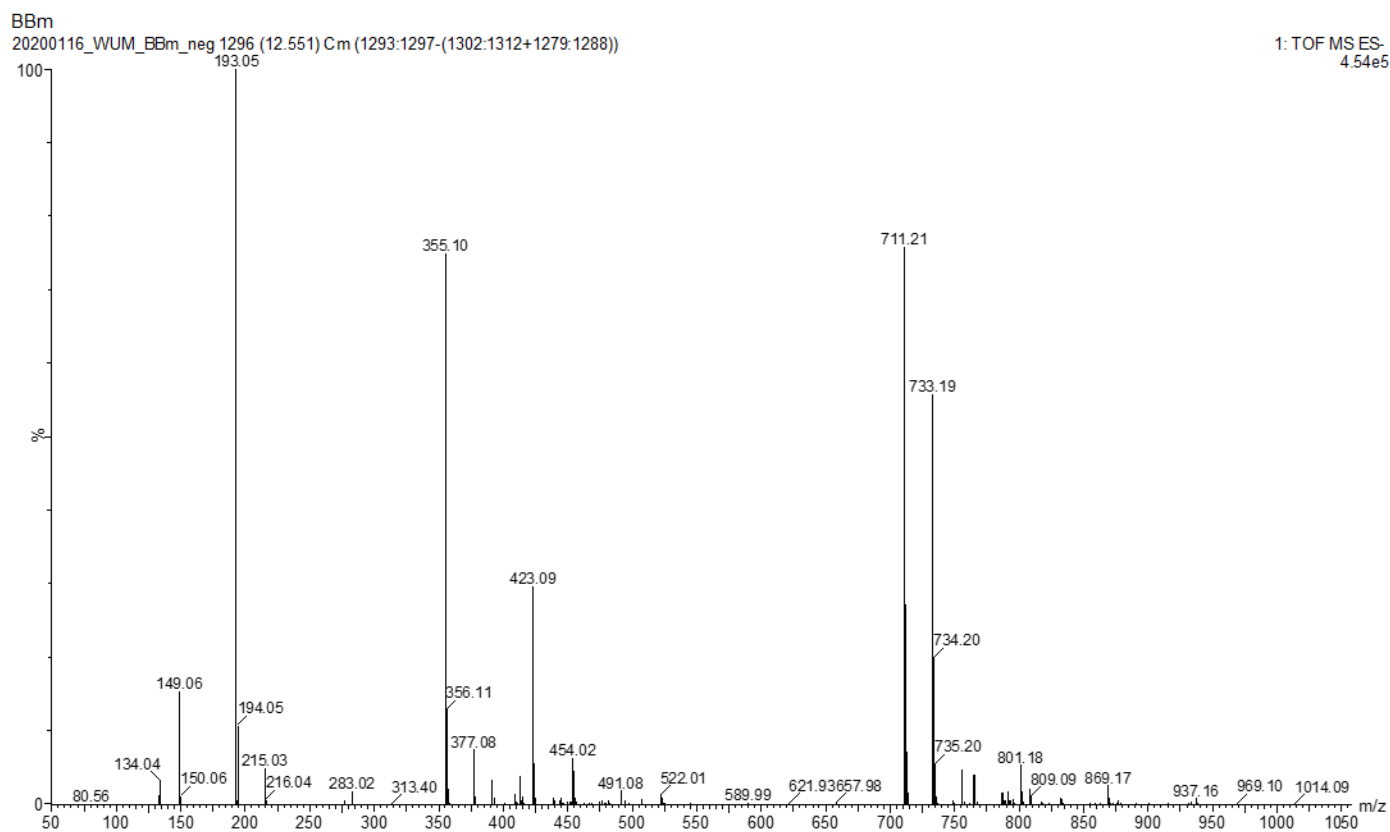

Figure S3: Mass spectrum of ferulic acid glucoside obtained for Betty's Blue macerate.
